# Supplementary material
Source: PubMed Central journal article supplement (PMC8608744)
Supplement: NIHMS1742895-supplement-1.pdf [file NIHMS1742895-supplement-1.pdf]

**AZD5438-PROTAC: A Selective CDK2 Degradator that Protects Against Cisplatin-  
and Noise-Induced Hearing Loss**

Santanu Hati<sup>a1</sup>, Marisa Zallocchi<sup>a1</sup>, Robert Hazlitt<sup>b1</sup>, Yuju Li<sup>a</sup>, Sarath

Vijayakumar<sup>a</sup>, Jaeki Min<sup>b</sup>, Zoran Rankovic<sup>b</sup>, Sándor Lovas<sup>a</sup>, Jian Zuo<sup>a</sup>

<sup>a</sup> Department of Biomedical Sciences, School of Medicine, Creighton University,  
Omaha, NE 68178

<sup>b</sup> Department of Chemical Biology & Therapeutics, St. Jude Children's Research  
Hospital, Memphis, TN 38105

<sup>1</sup> Equal author contribution

**ORCID identifier:**

Sándor Lovas: 0000-0002-5089-5186

Marisa Zallocchi: 0000-0002-6520-988X

Jian Zuo: 0000-0002-5395-2887

**Corresponding author:** Dr. Jian Zuo

2500 California Plaza

Omaha, NE 68178

Ph: 402.280.2916

[jianzuo@creighton.edu](mailto:jianzuo@creighton.edu)

# Scheme 1

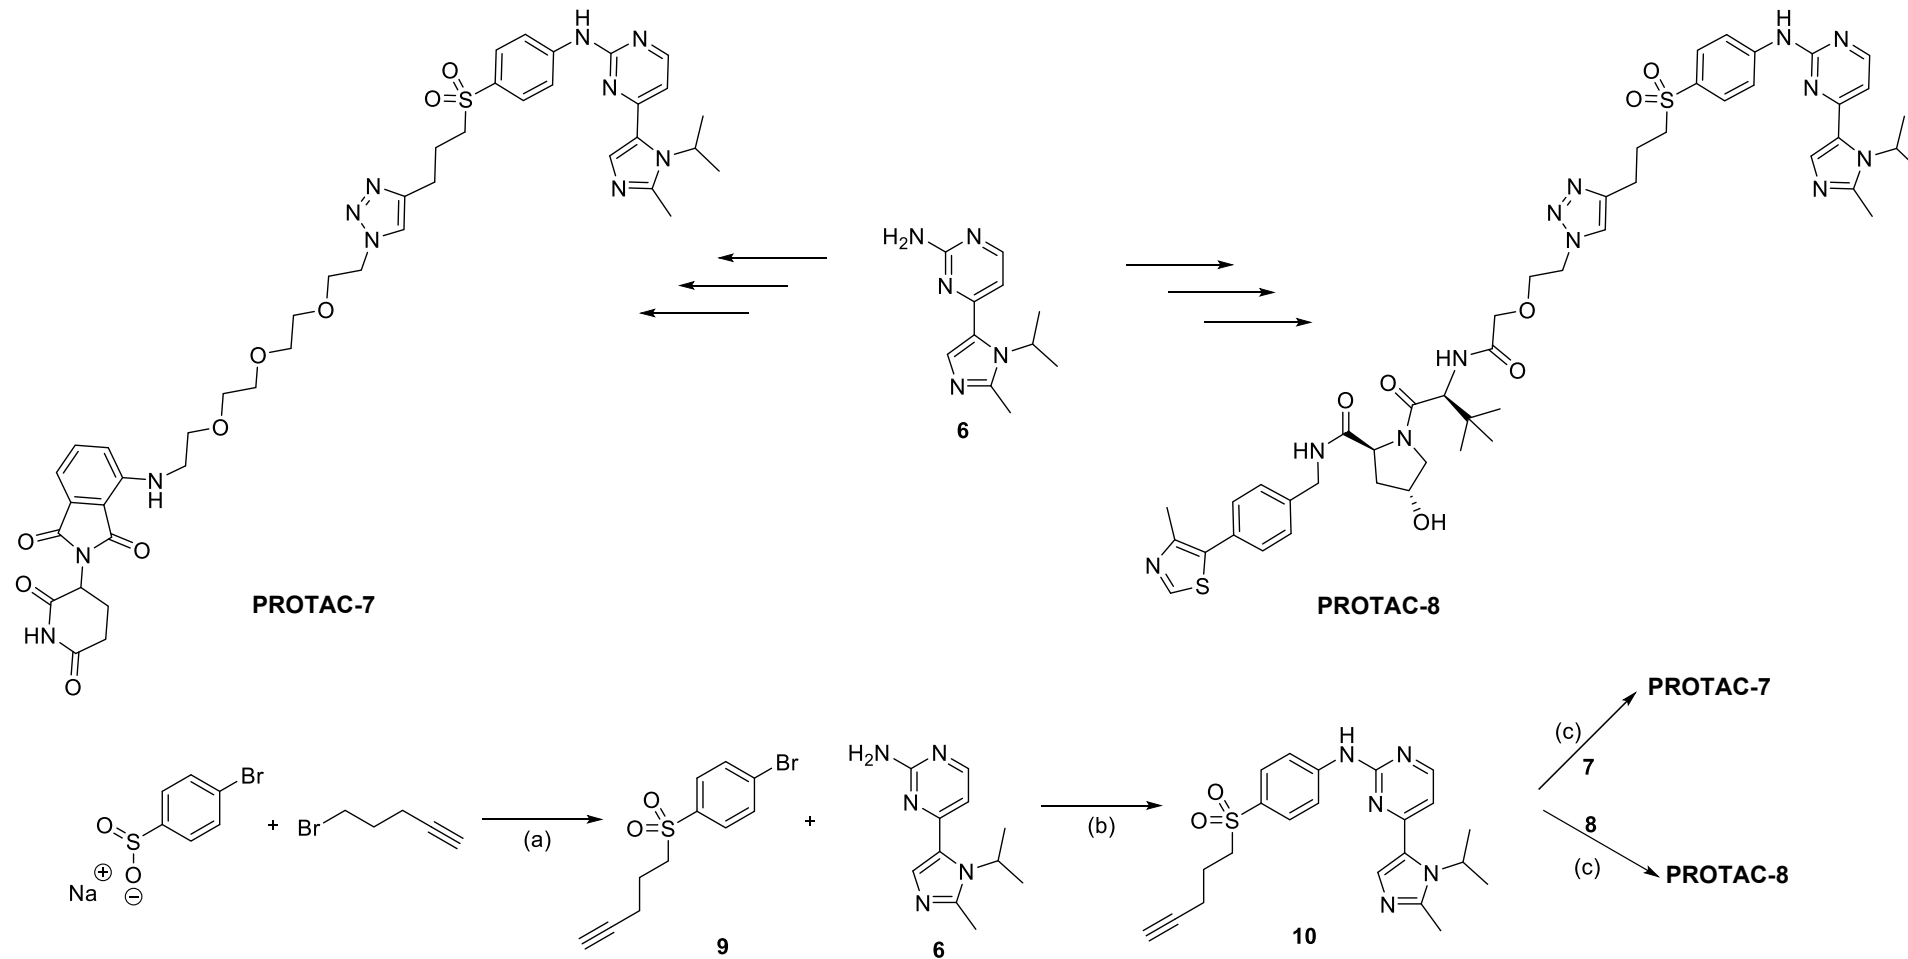

Scheme 1. Reagents and conditions: (a) DMF, rt, 36h. (b) NaOtBu (3.0 equiv.), BINAP (0.1 equiv.), Pd<sub>2</sub>(dba)<sub>3</sub> (0.05 equiv.), 1,4-Dioxane, 80 °C, 2h. (c) CuSO<sub>4</sub> (1.1 equiv.), Sodium ascorbate (2.2 equiv), DMSO:H<sub>2</sub>O (1:1), rt, 20h.

## Scheme 2

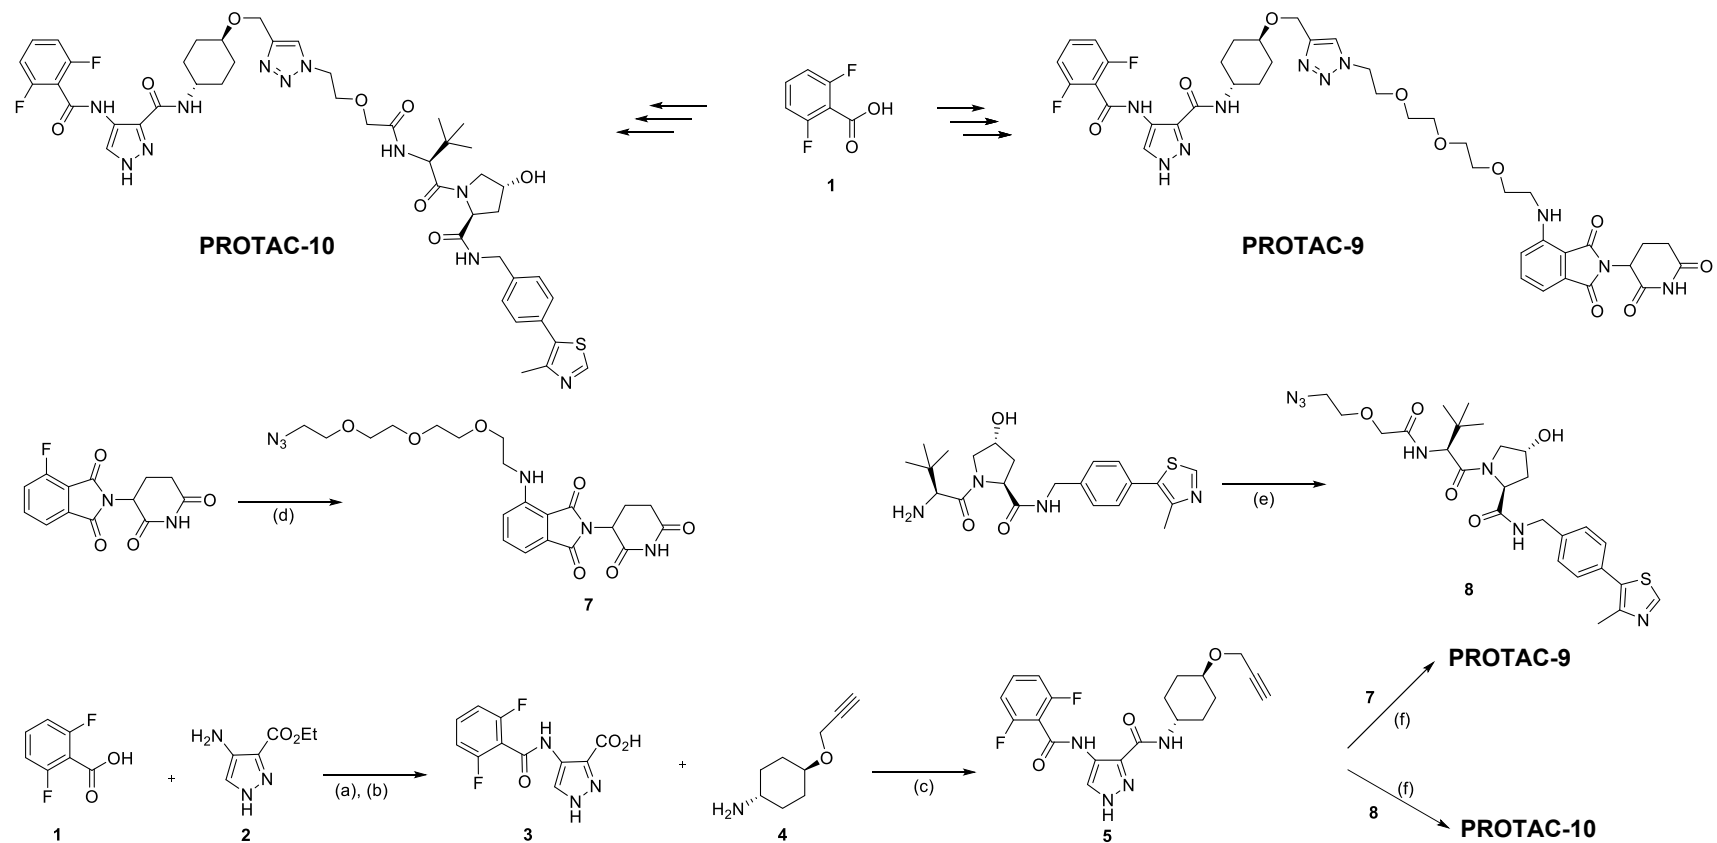

Scheme 2. Reagents and conditions: (a) EDC (1.2 equiv.), HOBt (1.2 equiv.), DMF, rt, 20h (b) NaOH/EtOH (2M), rt, 20h. (c) (1*r*,4*r*)-4-(prop-2-yn-1-yloxy)cyclohexan-1-amine (1.0 equiv.), EDC (1.2 equiv.), HOBt (1.2 equiv.), DMF, rt, 18h. (d) 2-(2-(2-(2-azidoethoxy)ethoxy)ethoxy)ethan-1-amine (1.0 equiv.), DIPEA (2.0 equiv.), DMF, 90 °C, 18h. (e) 2-(2-azidoethoxy)acetic acid (1.0 equiv.), DIPEA (6.0 equiv.), HATU (4.0 equiv.), DMF, 0°C-rt, 20 min (f) CuSO<sub>4</sub> (1.1 equiv.), Sodium ascorbate (2.2 equiv.), DMSO:H<sub>2</sub>O (1:1), rt, 20h.

SI Figure 1-A, 1H NMR-PROTAC-7

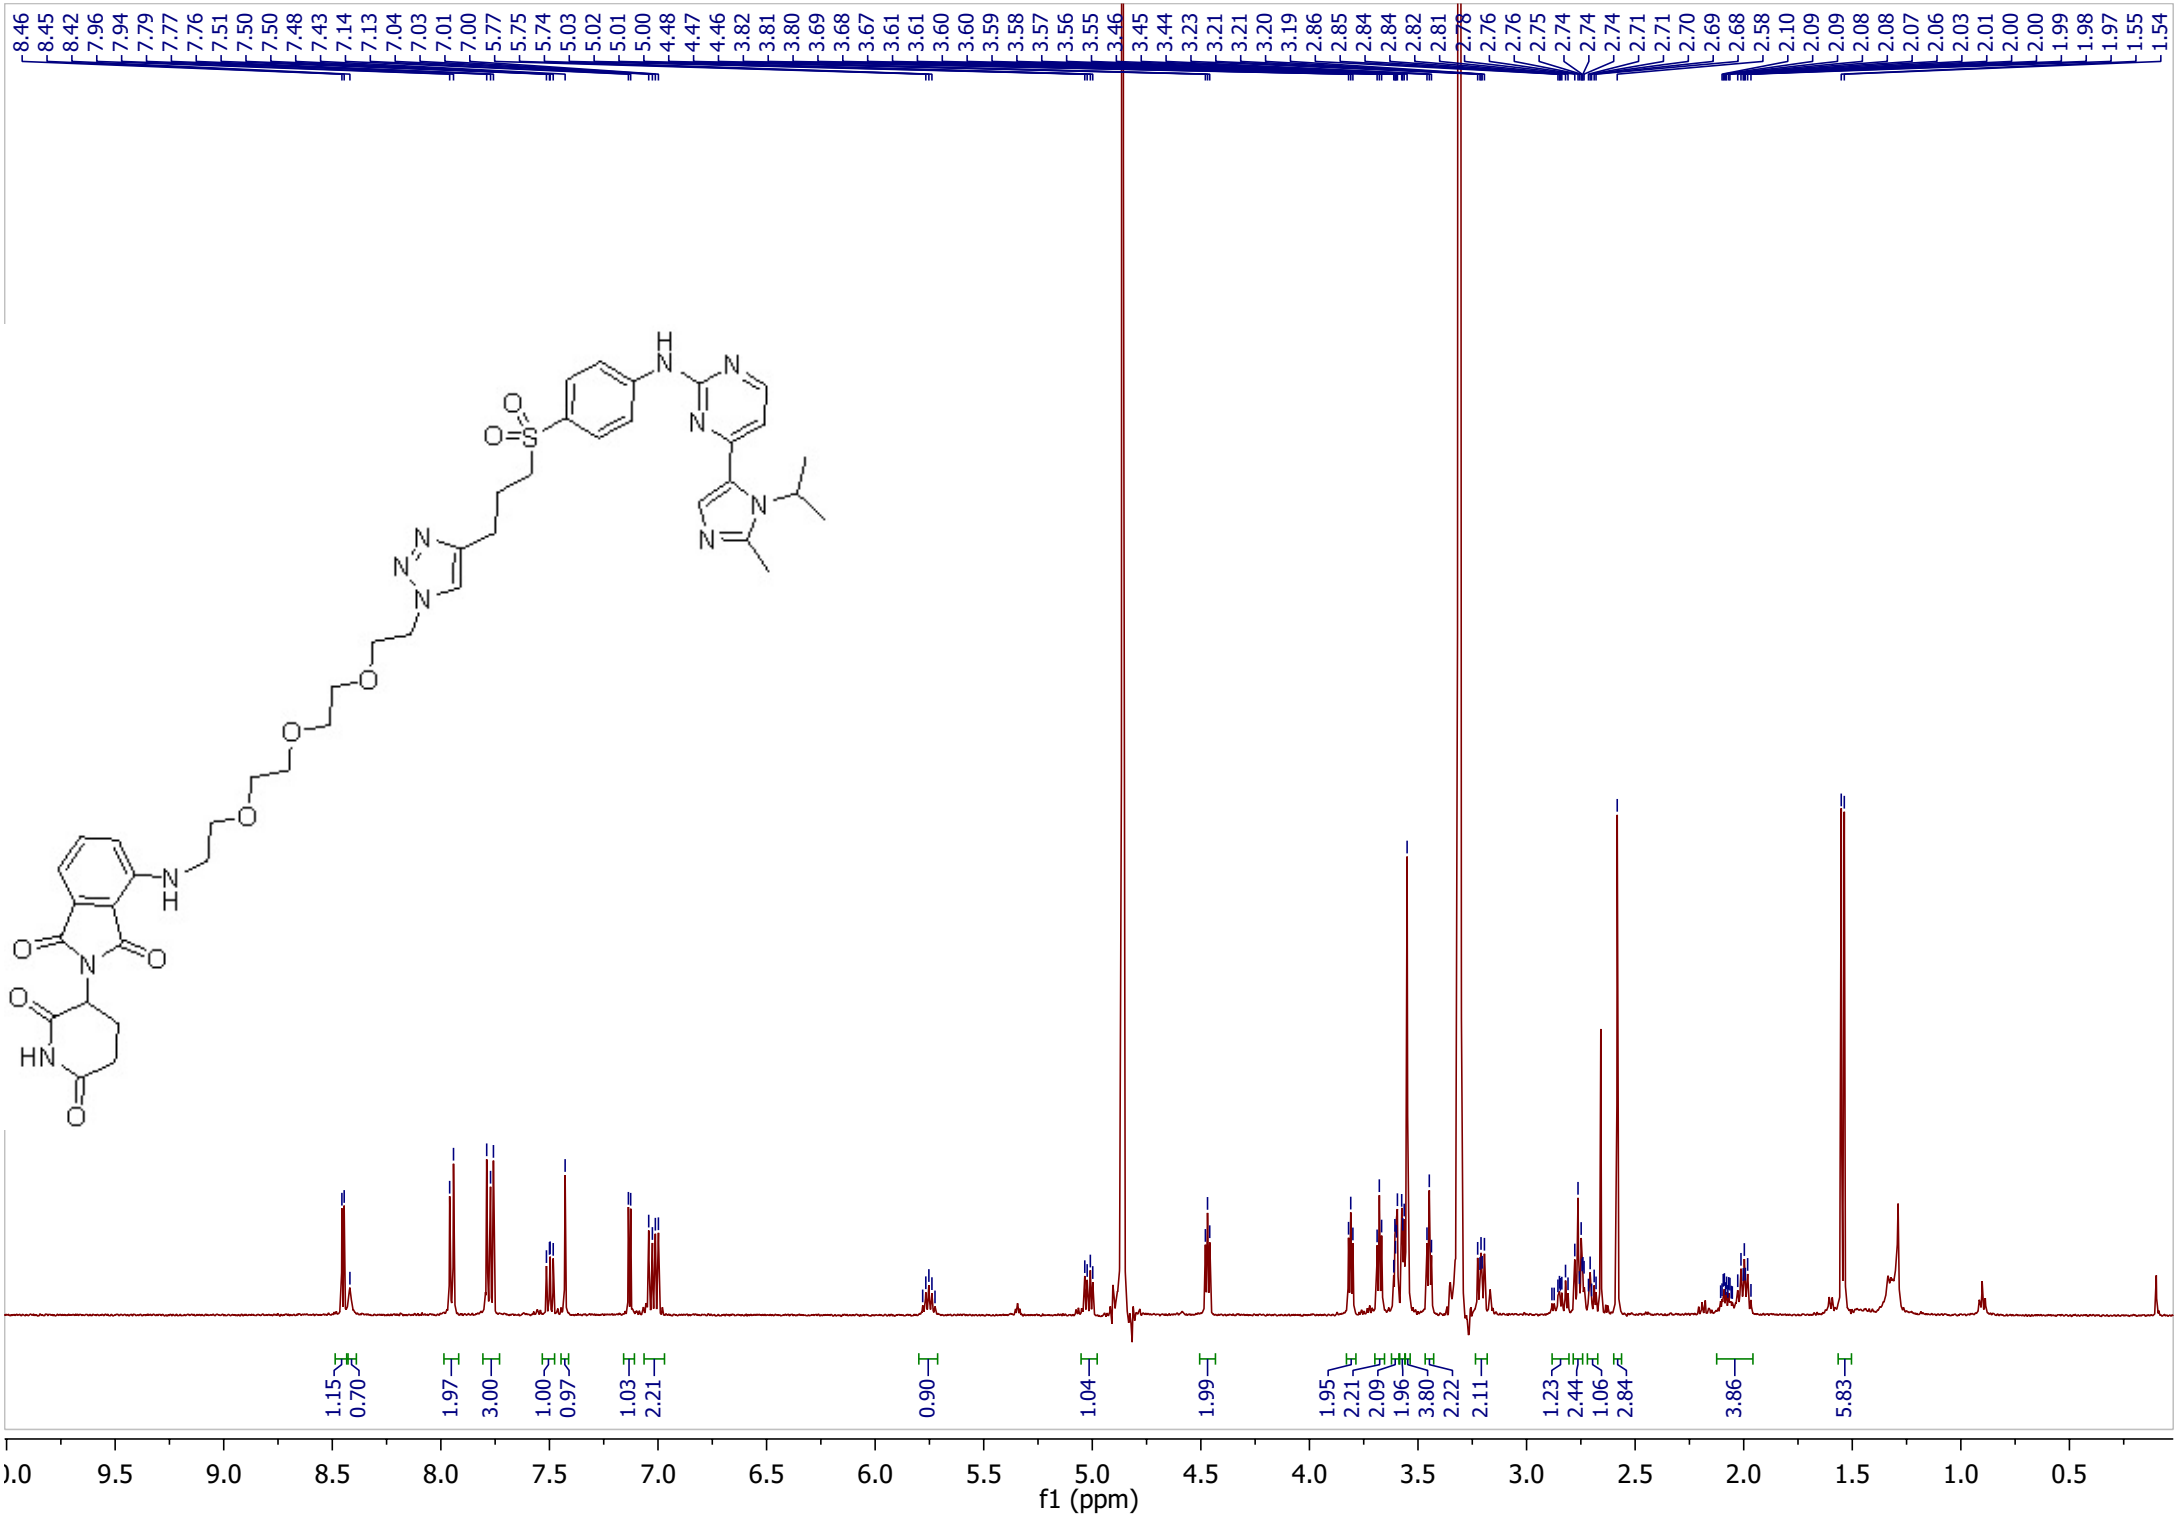

SI Figure 1-B, 1H NMR-PROTAC-8

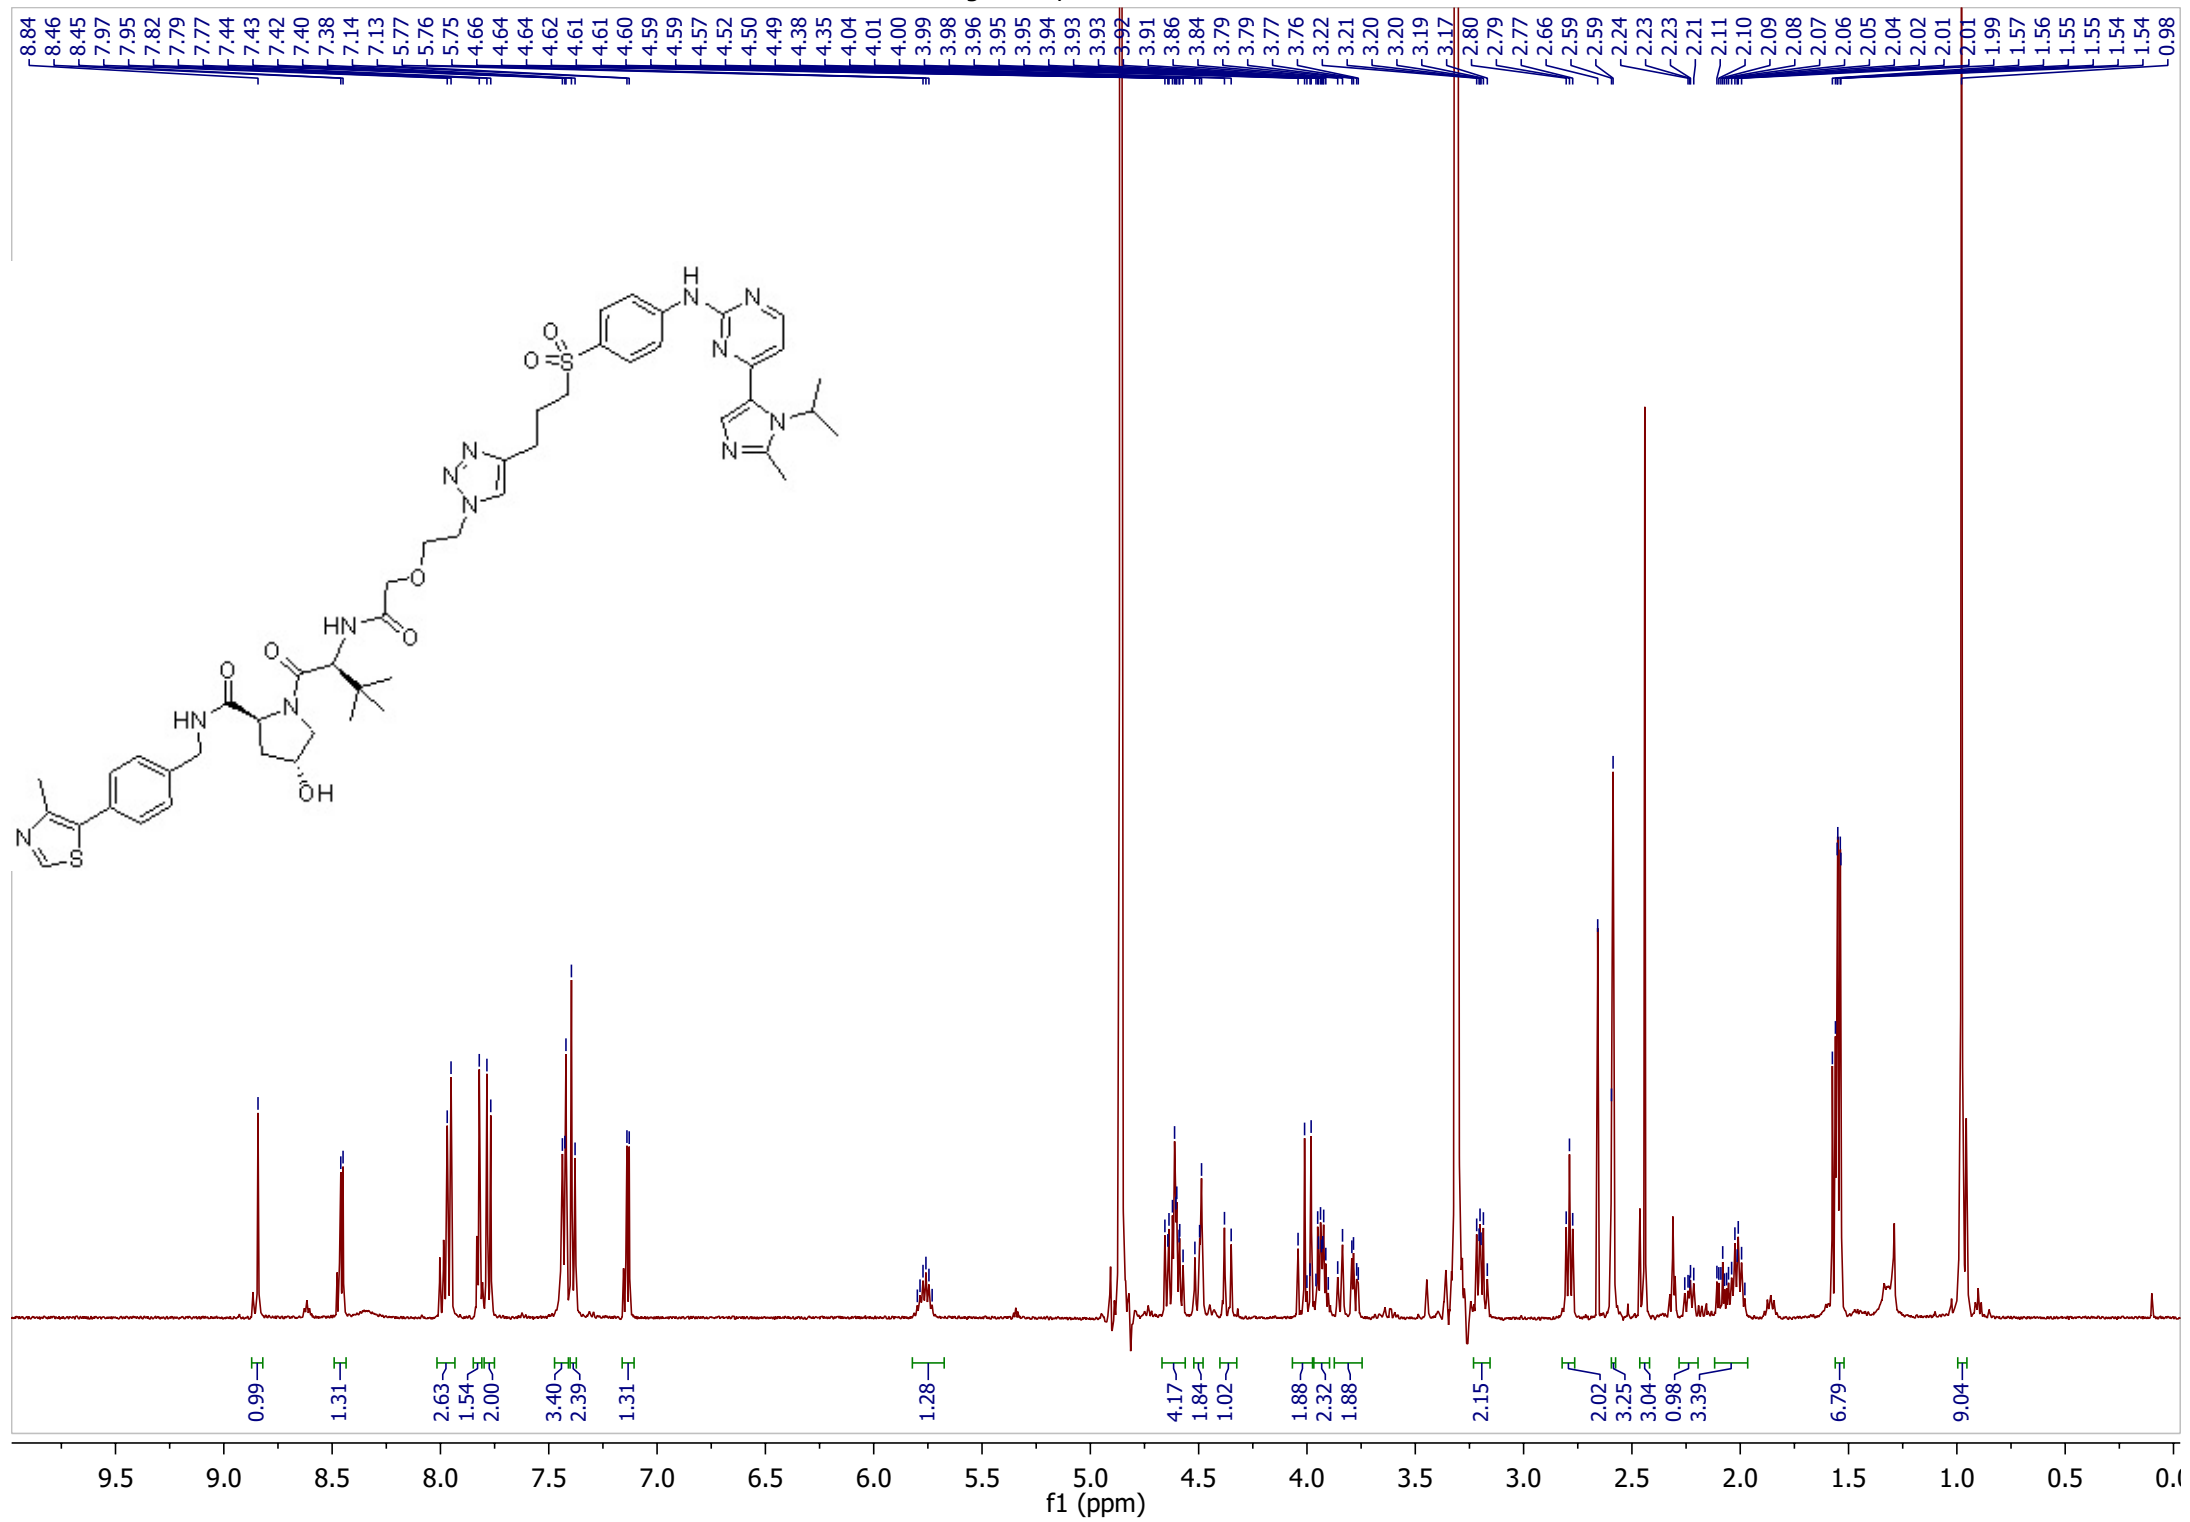

SI Figure 1-C, <sup>1</sup>H NMR-PROTAC-9

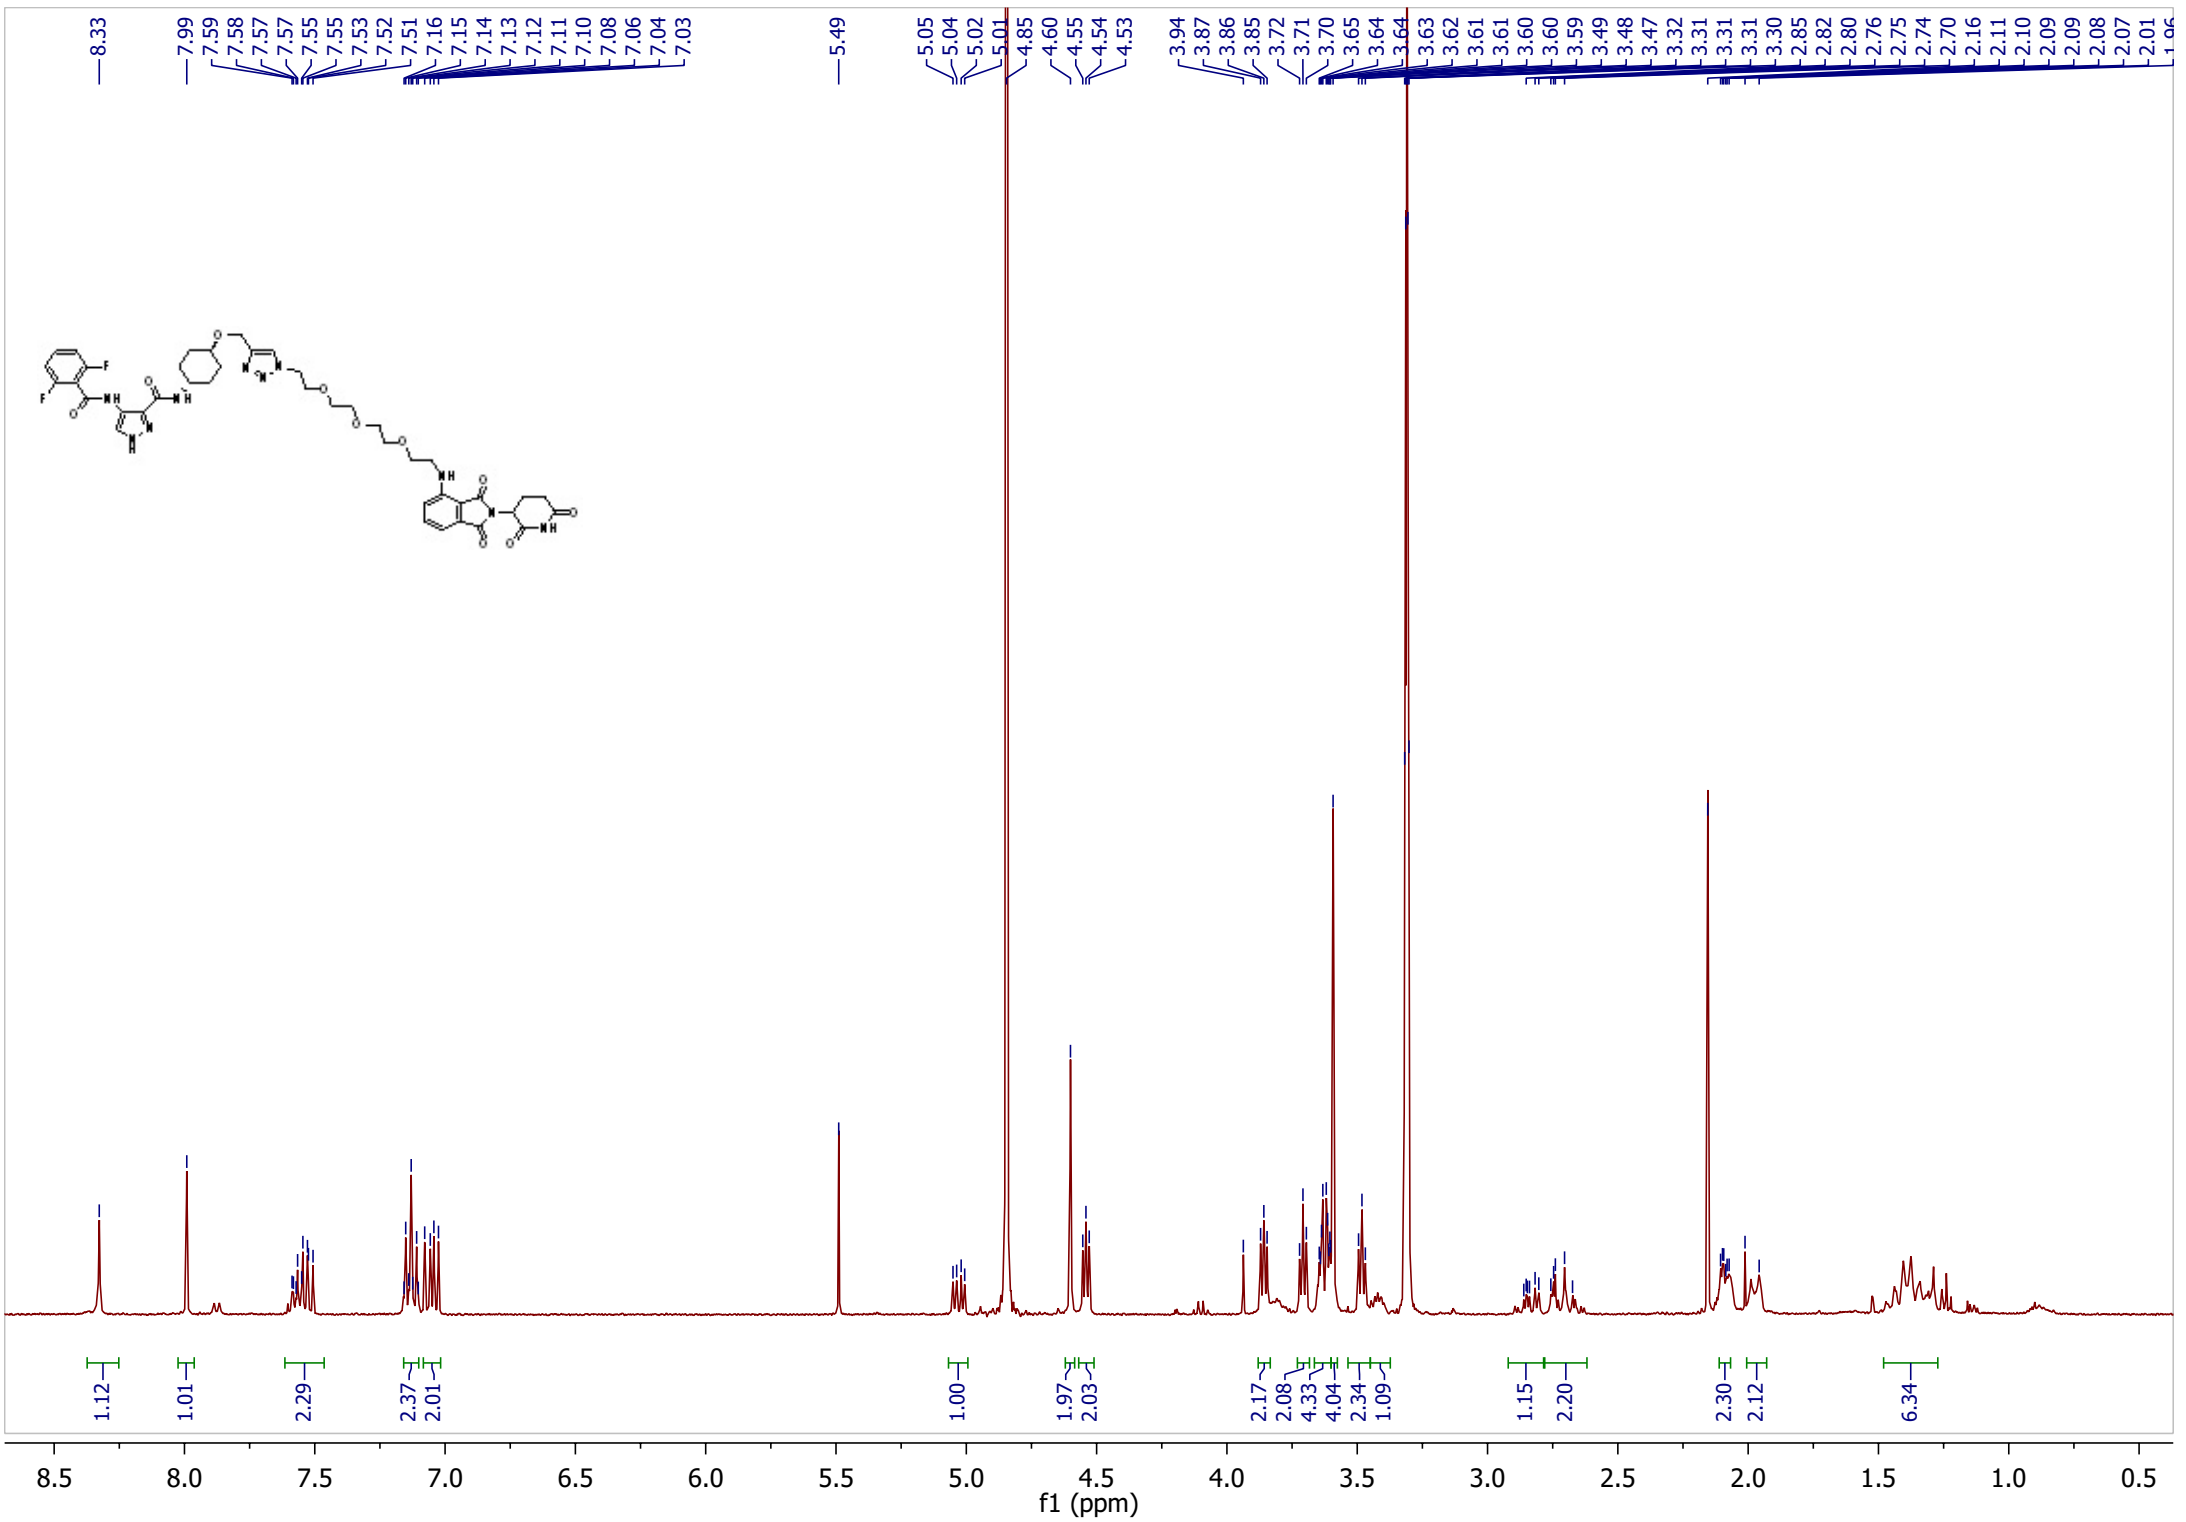

SI Figure 1-D, 1H NMR-PROTAC-10

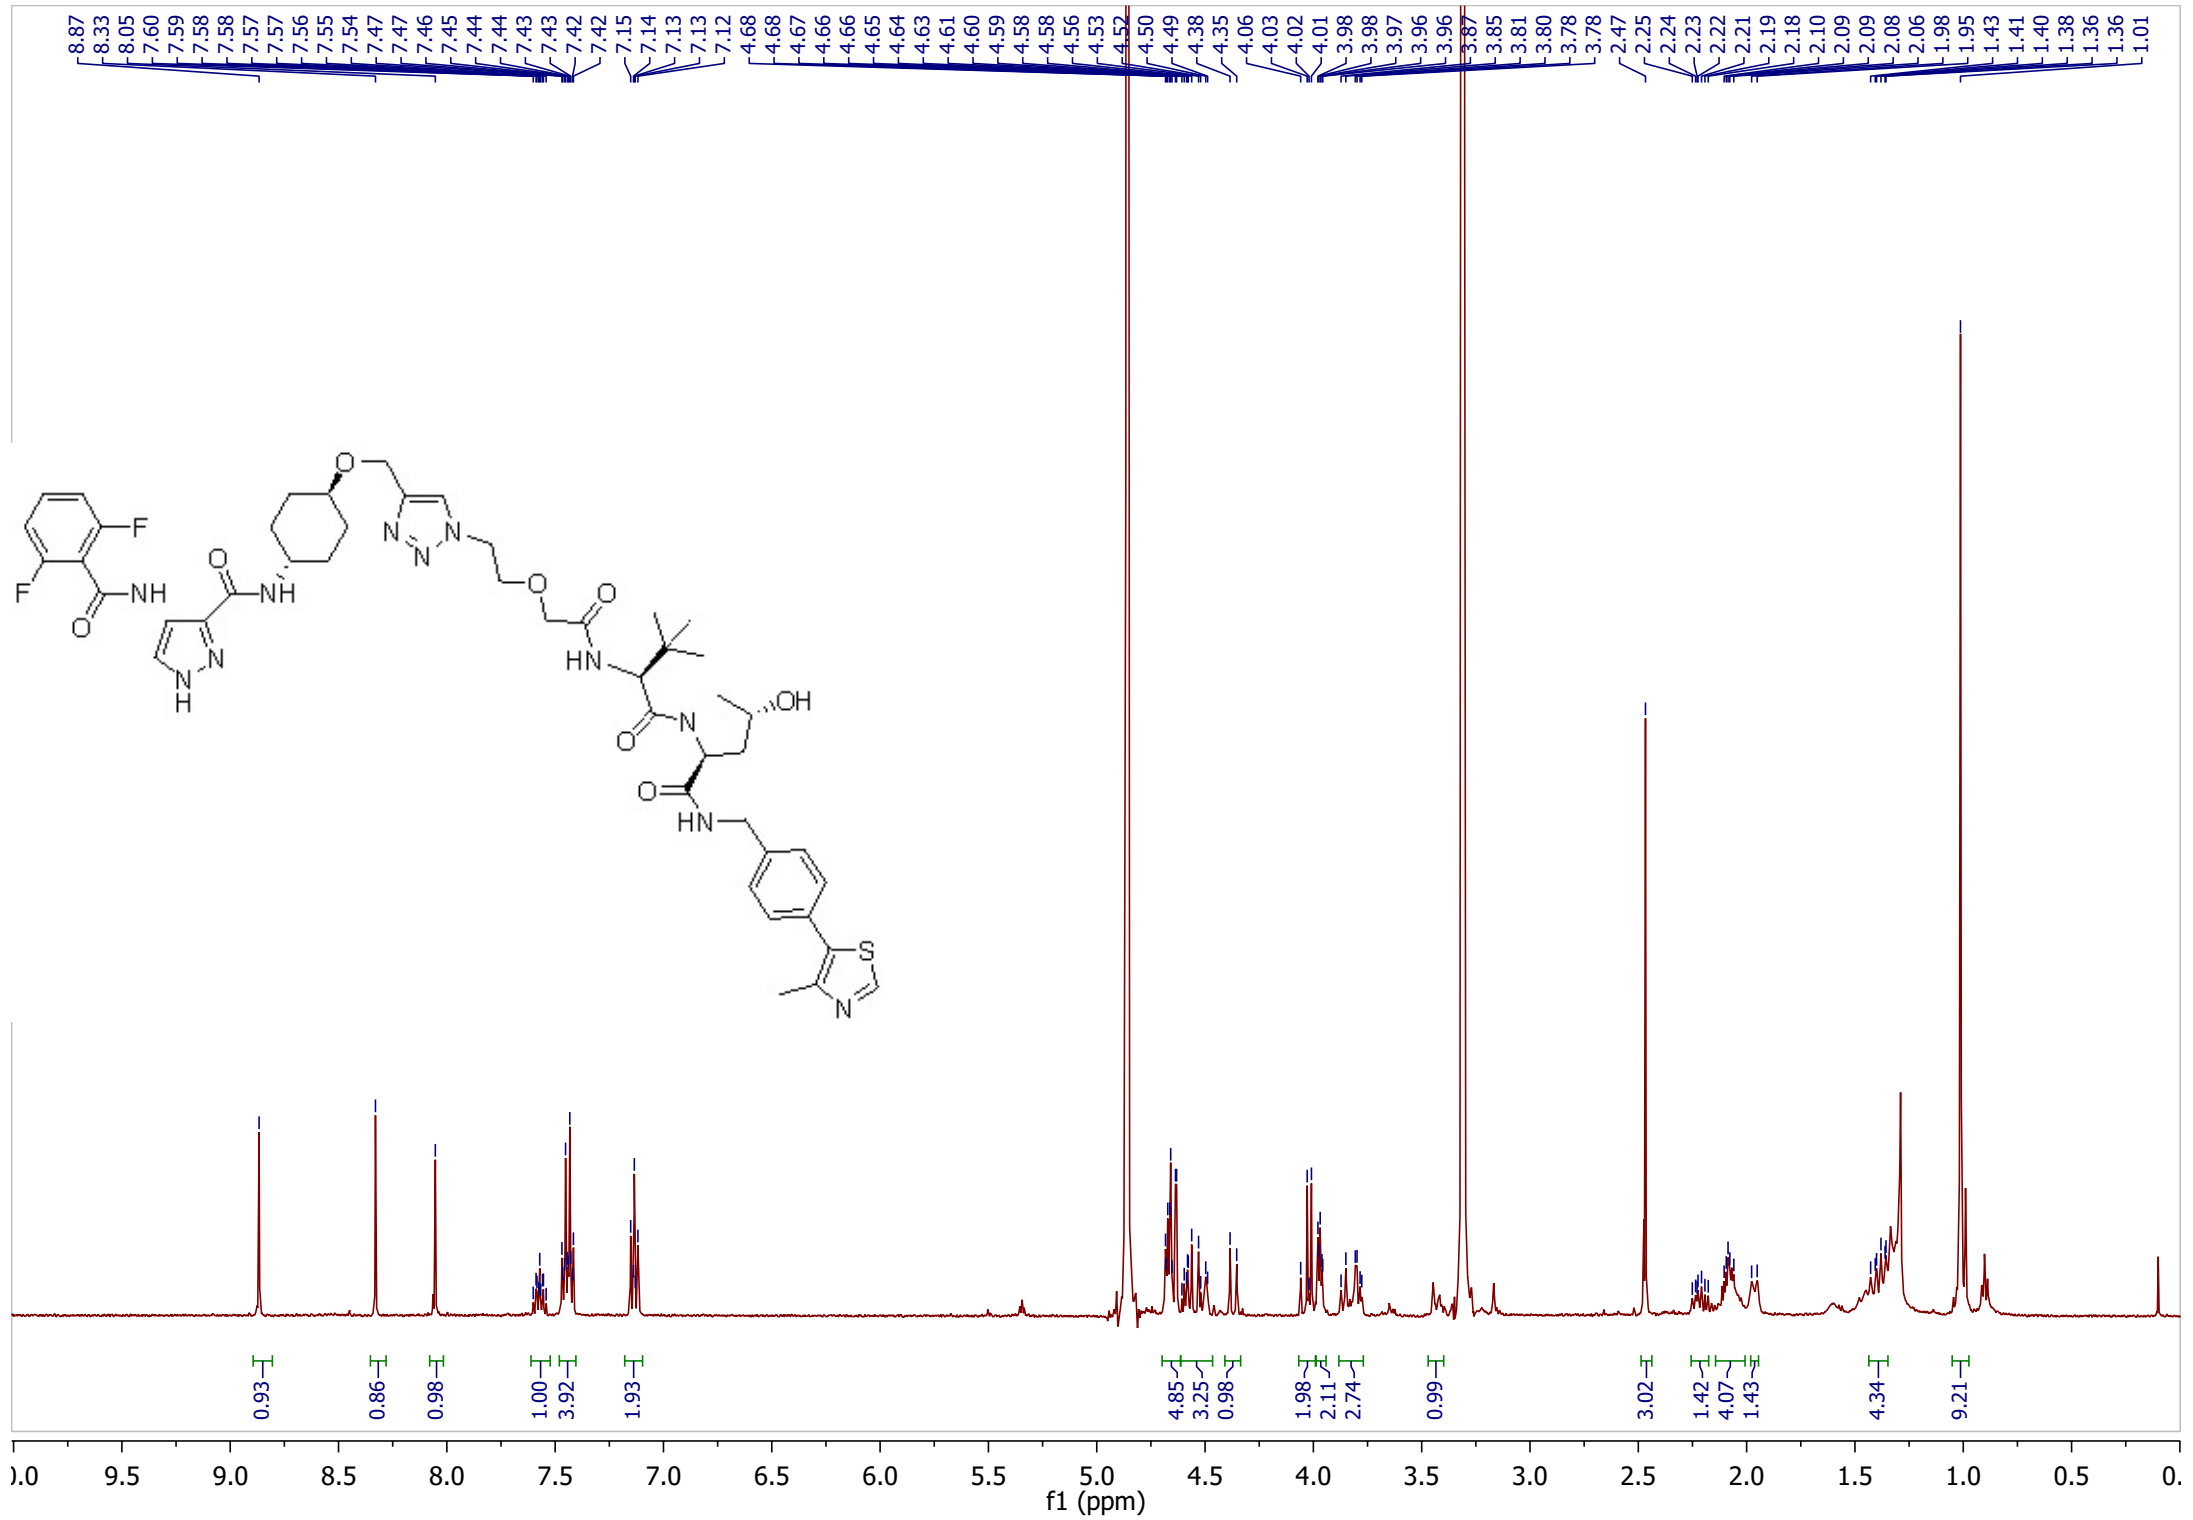

# HPLC-Traces

**PROTAC-9**

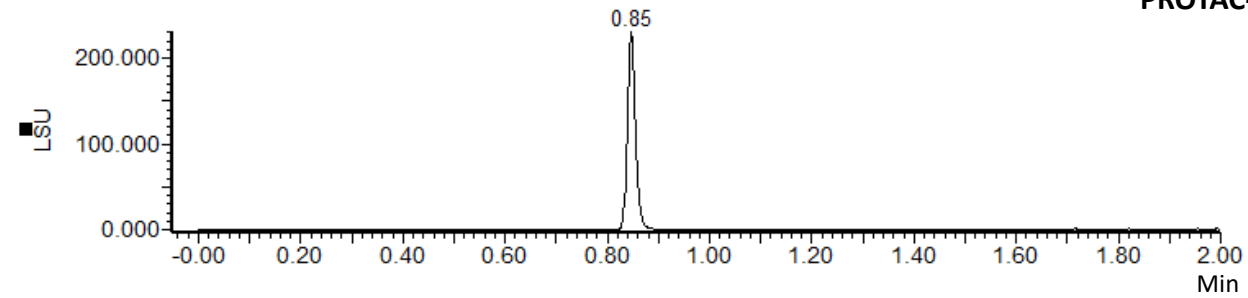

**PROTAC-7**

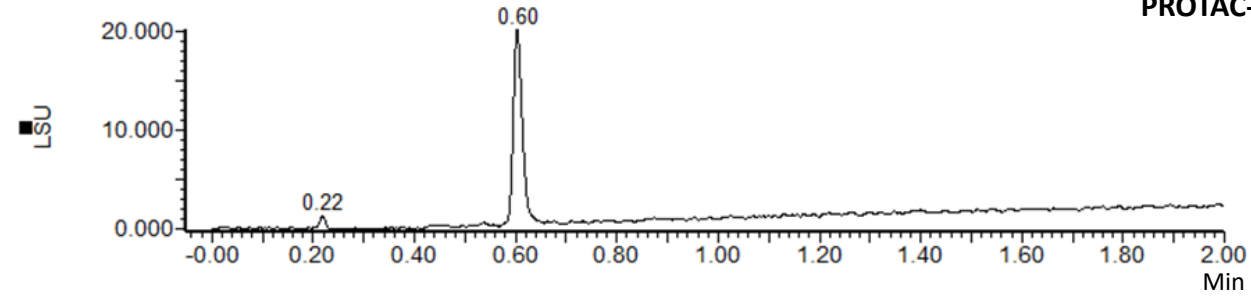

**PROTAC-8**

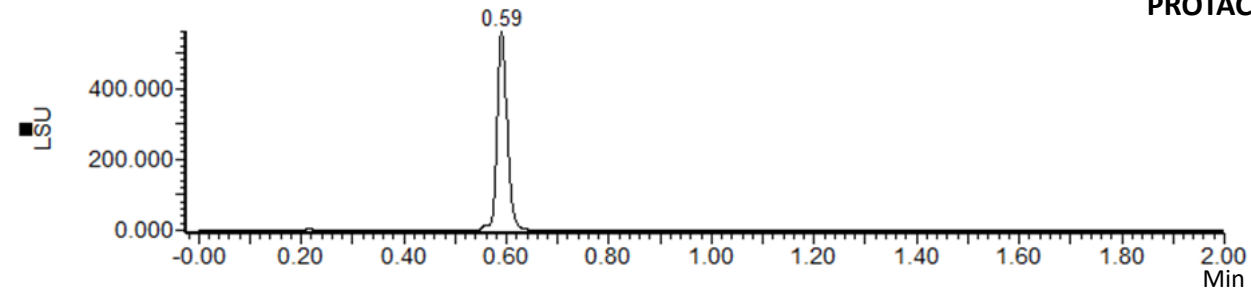

**PROTAC-10**

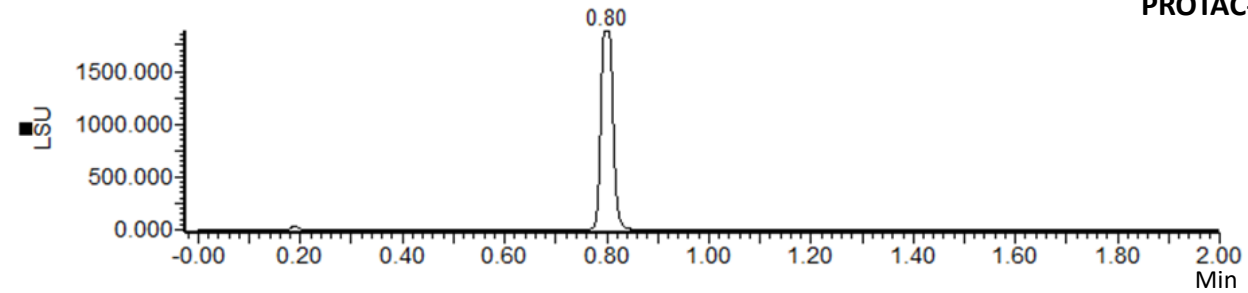



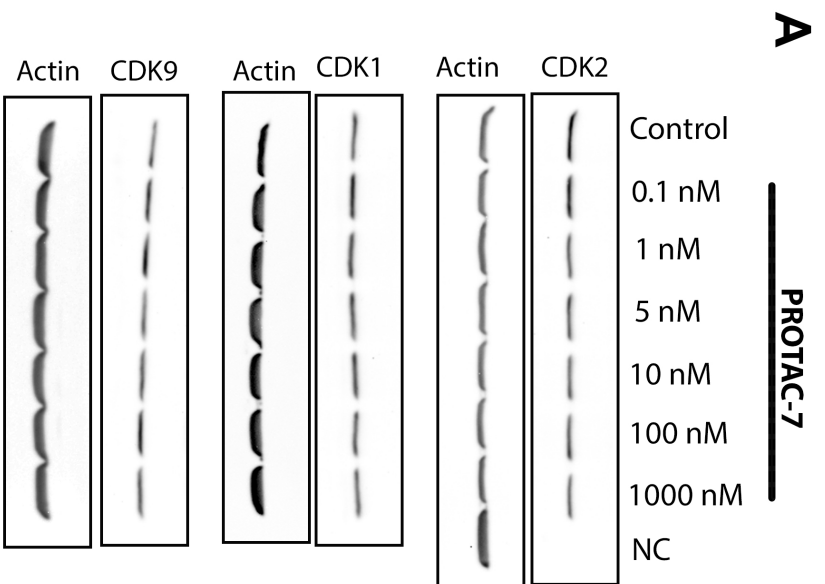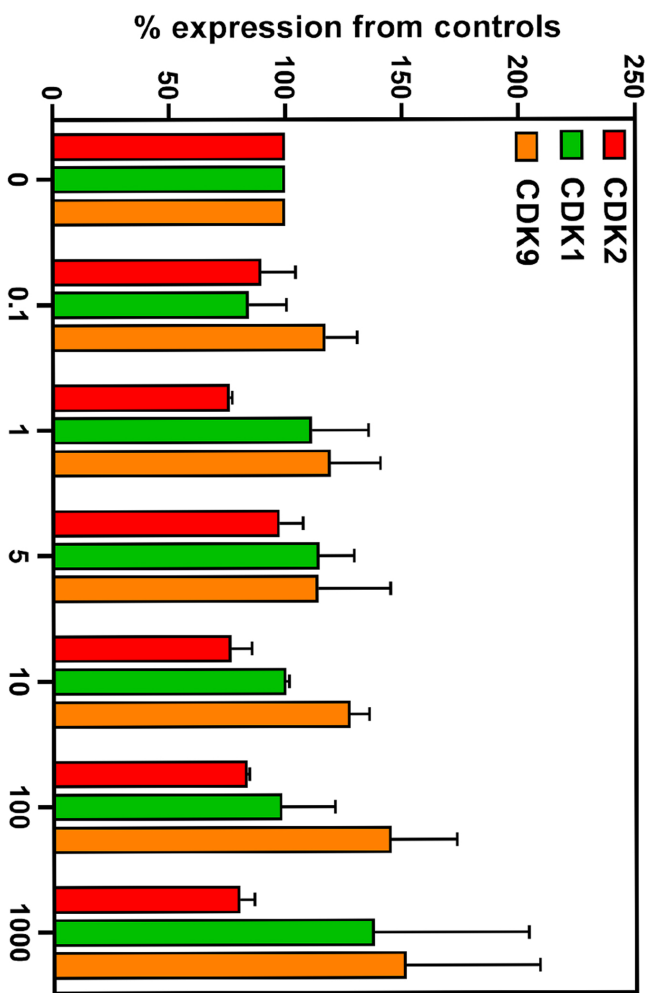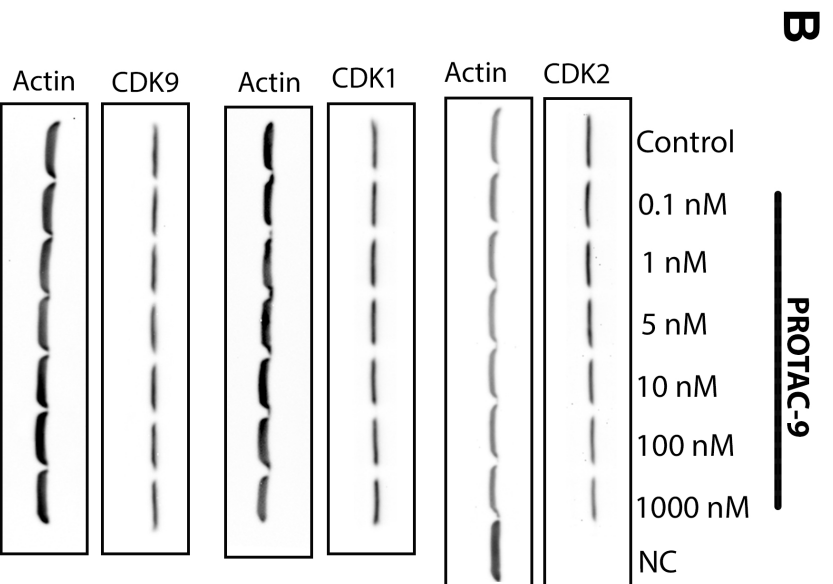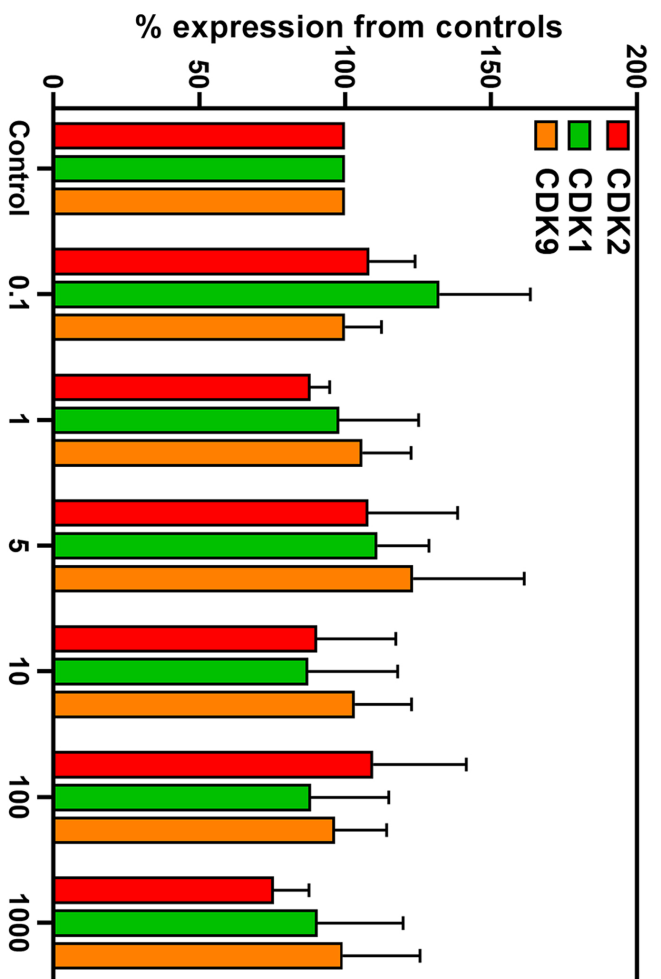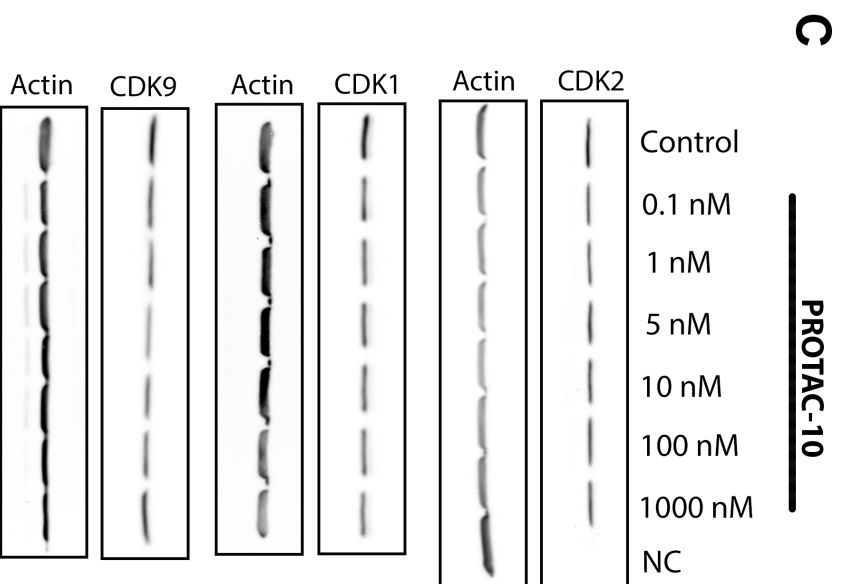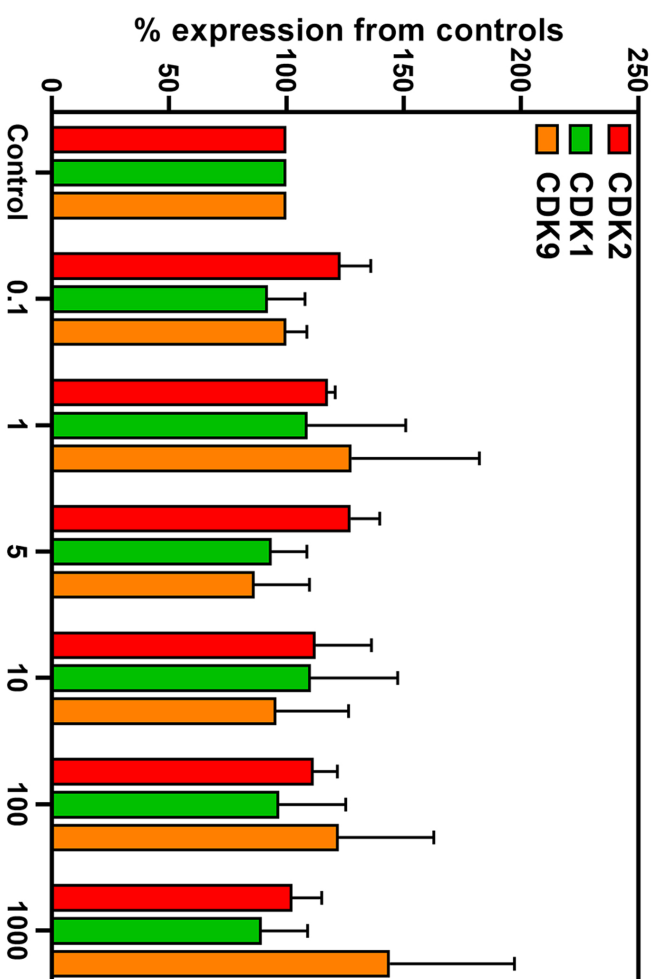

**SI Figure 2.** Characterization of PROTACs in HEI-OC1 cells. HEI-OC1 cells were incubated for 24 hours with different concentrations of PROTAC-7 (**A**), PROTAC-9 (**B**) and PROTAC -10 (**C**). Cells were harvested and processed for immunoblot detection of CDK2, CDK1 and CDK9. Left: Representative immunoblots. Right: Quantification analysis of the specific bands for CDK2, CDK1 and CDK9 from two independent experiments. Results were expressed as mean +/- SEM. Actin was used as a loading control. NC: Kidney lysate from CDK2 knockout mouse used as a negative control for CDK2 immunodetection.

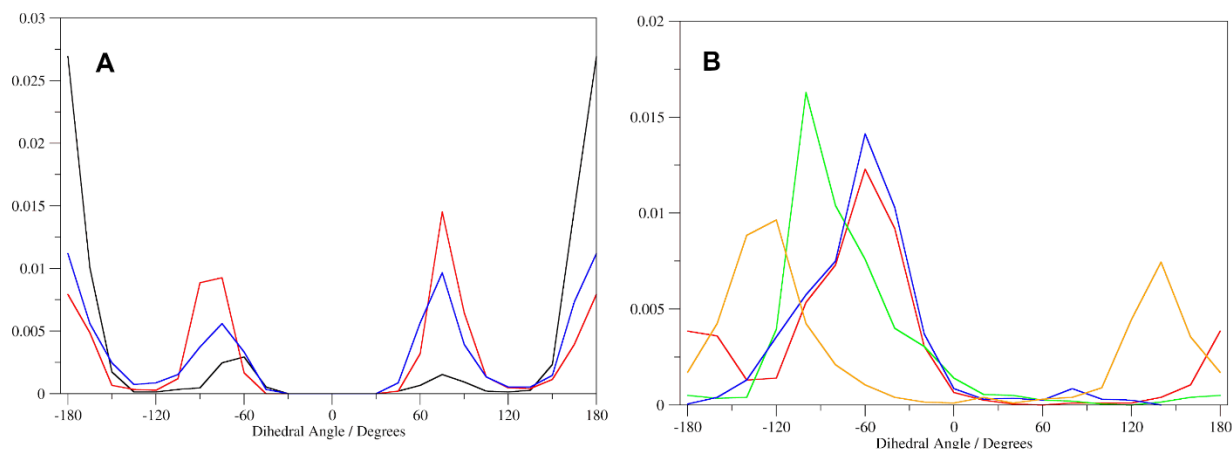

**SI Figure 3.** Distribution of  $\alpha_1$ ,  $\alpha_2$ ,  $\alpha_3$  and  $\alpha_4$  dihedral angles during MD simulations. Definition of the dihedral angles are given in the legend of Figure 3 in the main text. **A)** Distributions of  $\alpha_1$  (black),  $\alpha_2$  (red), and  $\alpha_3$  (blue) dihedral angles for MD simulation 1; **B),**  $\alpha_4$  dihedral angle in MD simulations 1, 2, 3, and 5, respectively black, red, blue and green is in gauche(-) conformations, whereas in MD simulation 5 (orange)  $\alpha_4$  explored both gauche(+) and gauche(-) conformations. MD simulations 1 and 2 resulted in similar  $\alpha_4$  dihedral angle distribution therefore the two curves are indistinguishable.

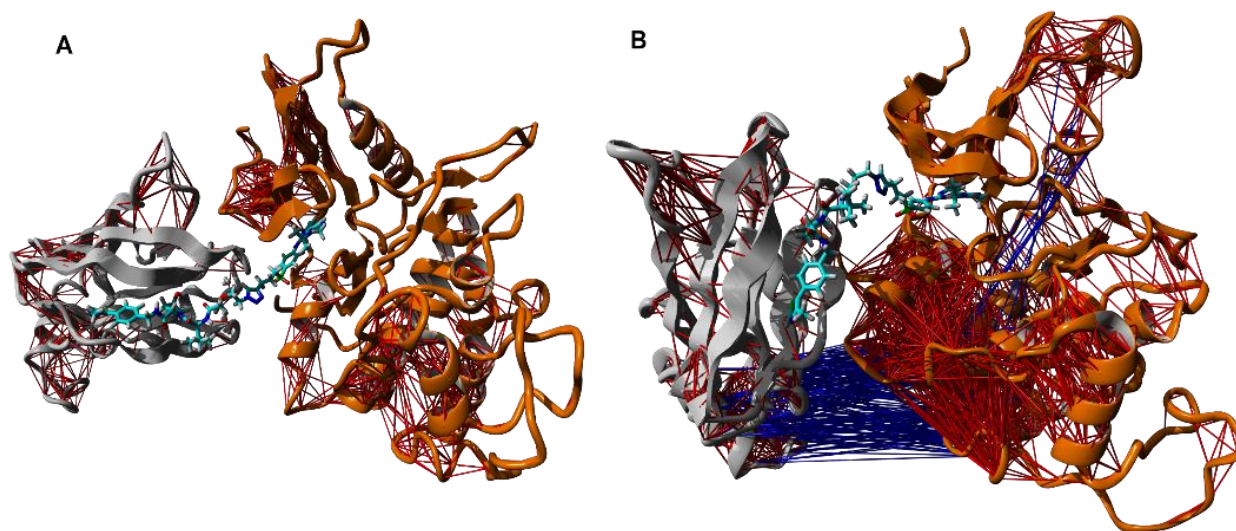

**SI Figure 4.** Dynamic cross-correlation matrix (DCCM) analysis of trajectories. pVHL (grey) connected through PROTAC-8 to CDK2 (orange), red and blue lines are shown between correlated and anti-correlated Ca atom pairs, respectively. **A)** In MD simulations 1-4 the two protein move independently from each other and only intradomain movement can be observed; **B)** in MD simulation 5 both intradomain correlated and interprotein anti-correlated movements are observed.
